# Supplementary material
Source: PubMed Central journal article supplement (PMC2754906)

Article title: Prognostic significance of copy-number alterations in multiple myeloma

Appendix Fig A1.

Kaplan-Meier analysis of overall survival in patients of the non SNP subset and of the SNP subset.

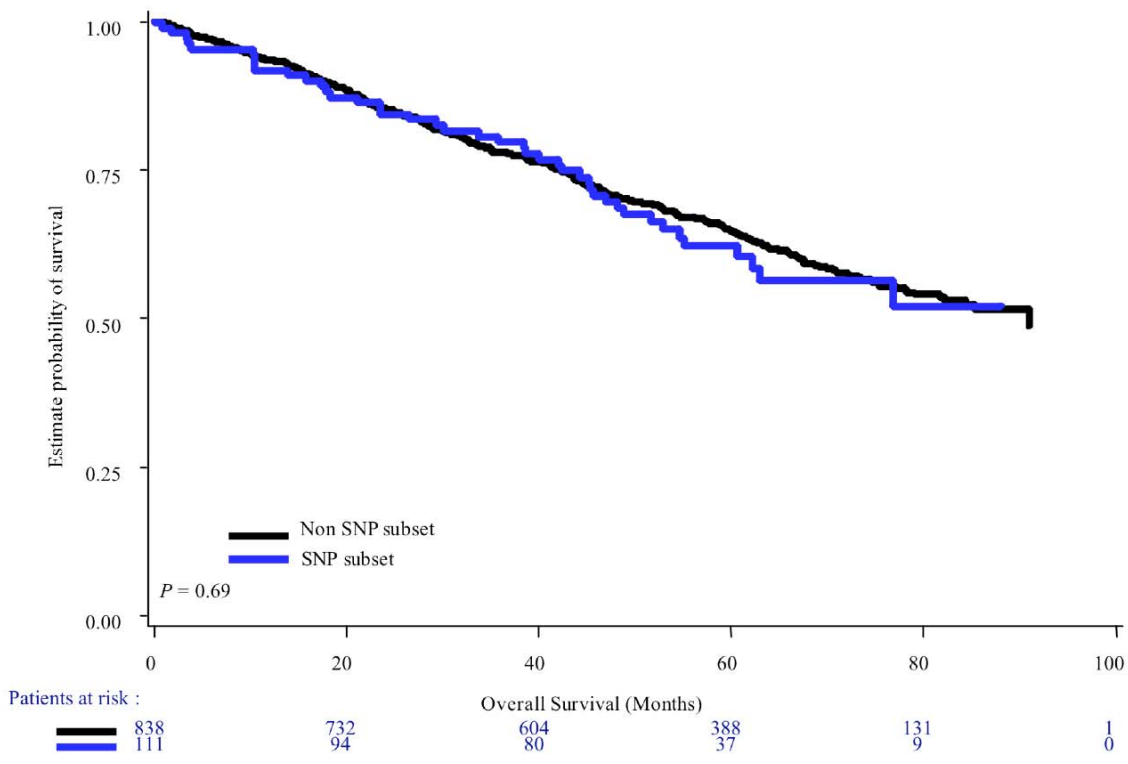

**Article title: Prognostic significance of copy-number alterations in multiple myeloma**

**Appendix Fig A2.**

Validation of 500K copy number method for estimating individual chromosome loss compared to FISH. 500K platform for chromosomal 13q14 are plotted on the y-axis as a function of FISH-derived % cells with anomalous 13q14 copy number. Red and blue frames mark del(13) status of the patients obtained with 500K platform and FISH respectively.

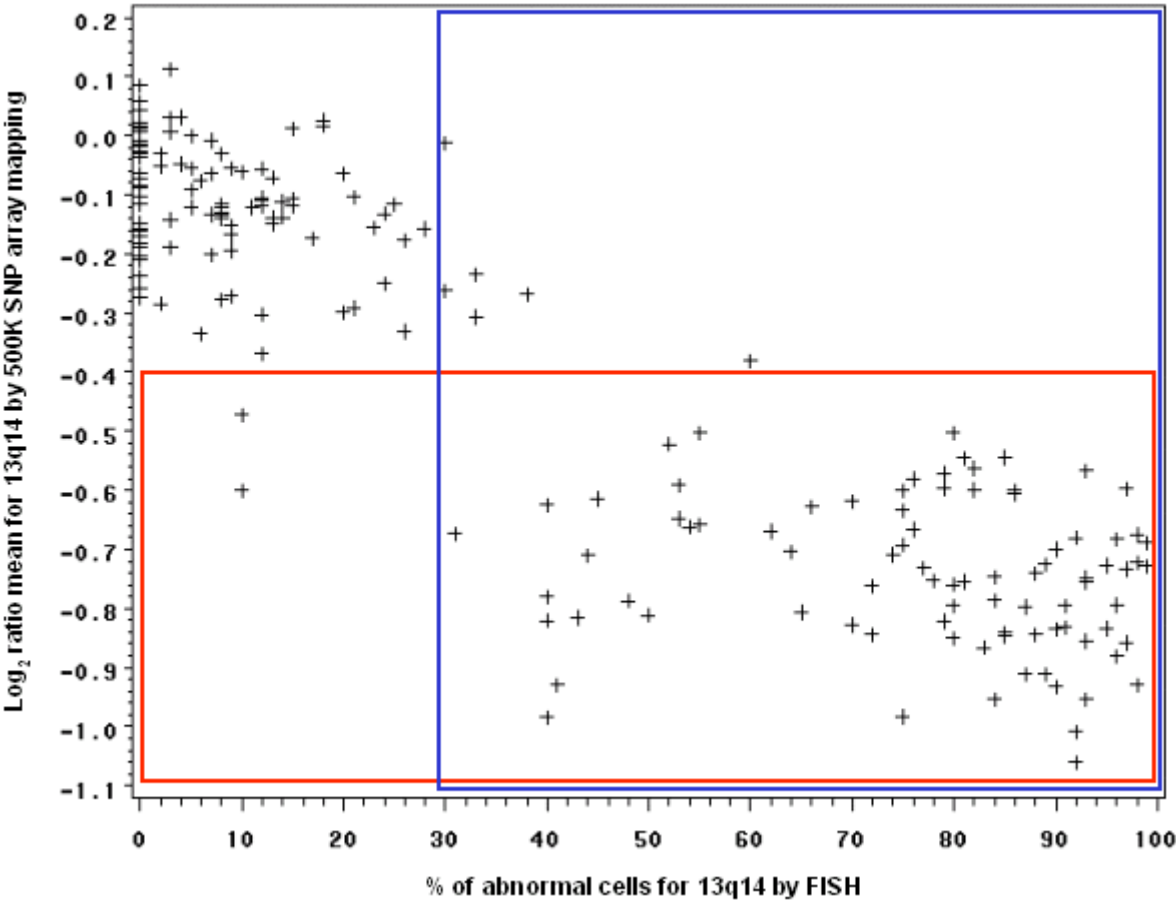

**Article title: Prognostic significance of copy-number alterations in multiple myeloma**

**Appendix Fig A3.**

Hierarchical clustering of MM according to group 1 and group 2 CNAs. Patients without CNAs were omitted; \* indicated dead patients, hyperdiploid MM are in blue, red is for gain and green for loss.

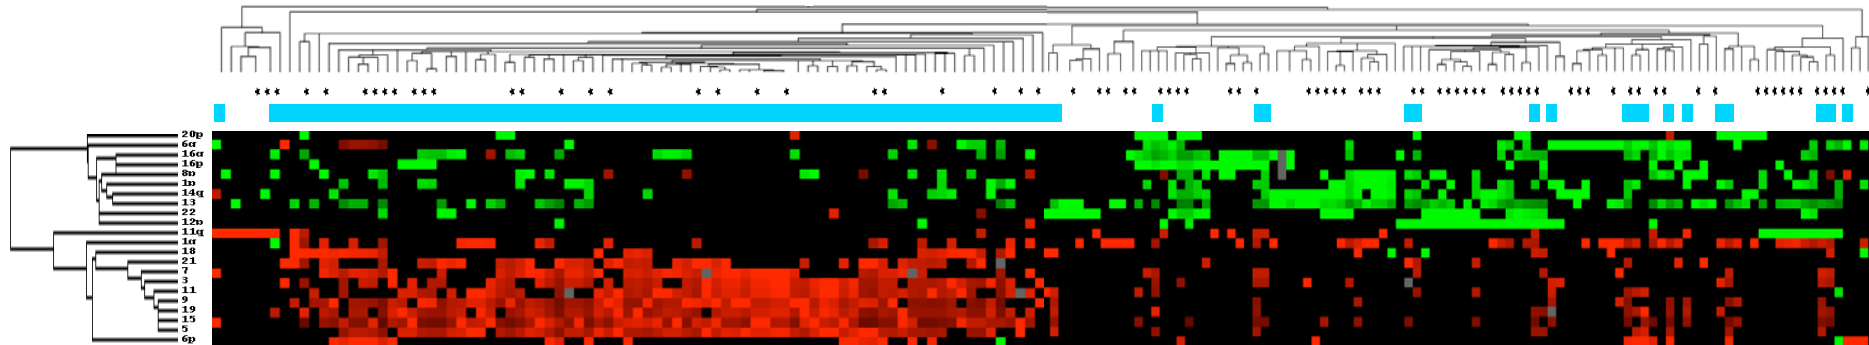

**Article title: Prognostic significance of copy-number alterations in multiple myeloma**

**Appendix Fig A4.**

Prognostic impact of amp(1q23.3), amp(5q31.3), del(12p13.31) on event-free survival.

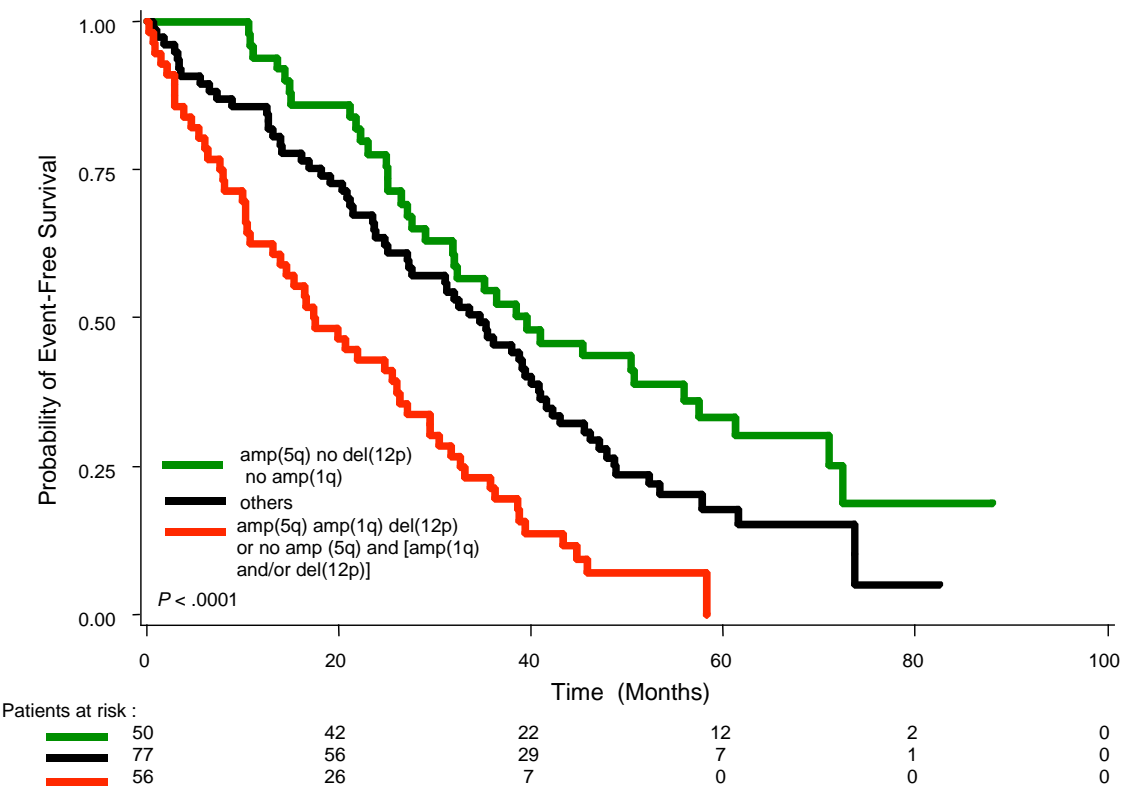

Article title: Prognostic significance of copy-number alterations in multiple myeloma

Appendix Fig A5.

Prognostic impact of amp(5q31.3), del(12p13.31) and Sβ<sub>2</sub>M ≥ 5.5 mg/L on event-free survival.

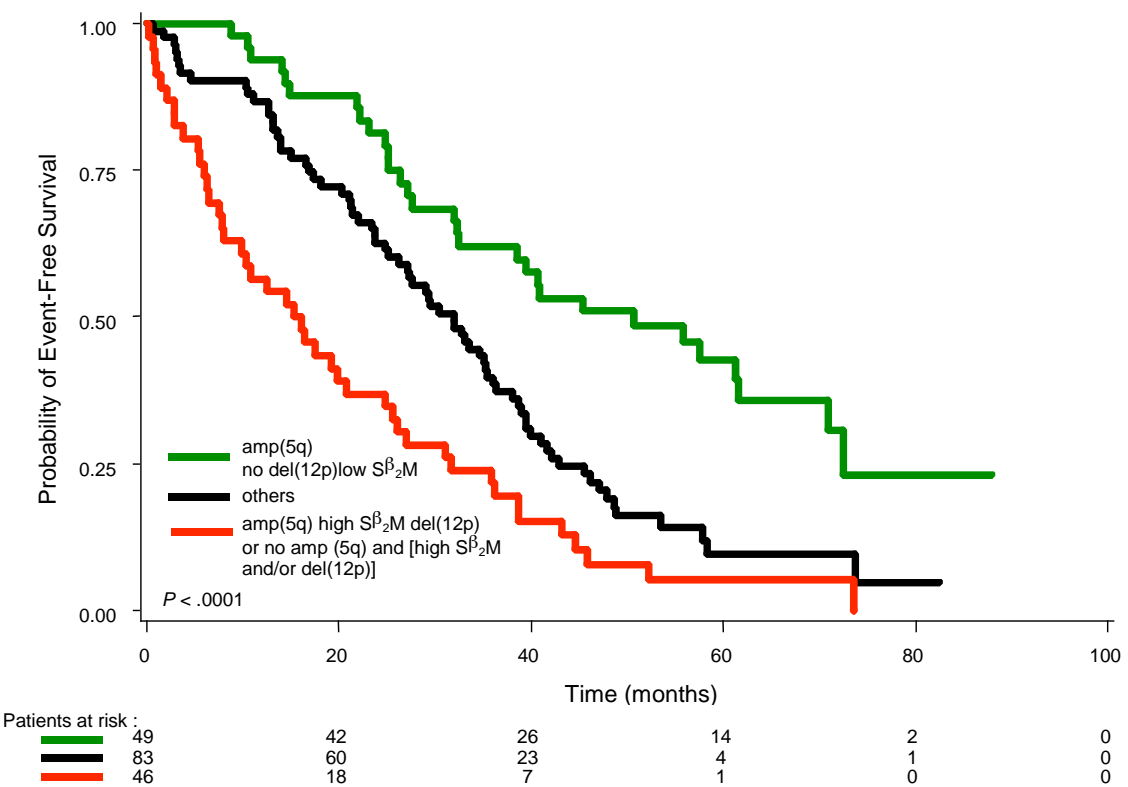

**Article title: Prognostic significance of copy-number alterations in multiple myeloma**

**Appendix Fig A6.**

Independent prognostic impact of 15-gene predictor and the CNA-based model in initial cohort

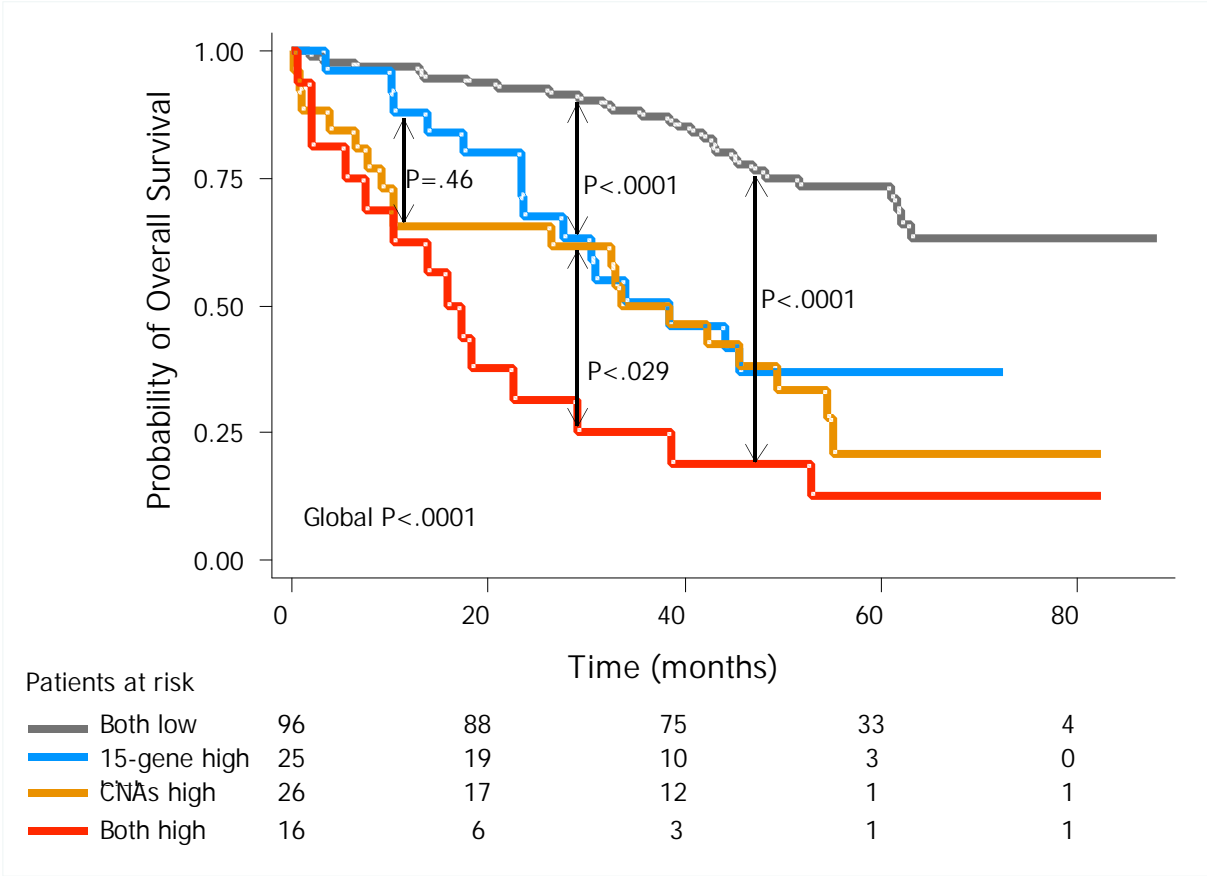

**Article title: Prognostic significance of copy-number alterations in multiple myeloma**

**Appendix Fig A7.**

Kaplan-Meier plot of overall survival considering the expression of the genes of interest residing in 1q21-23. Genes are ordered by increasing P-value (log-rank)

**ILF2 (NF45)**

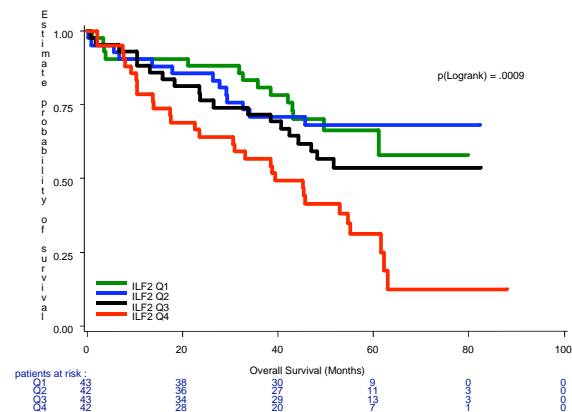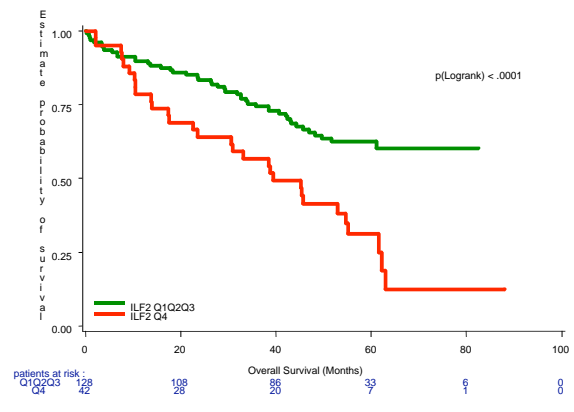

**ADAR (ADAR1, IFI4, G1P1, DSRAD, DRADA)**

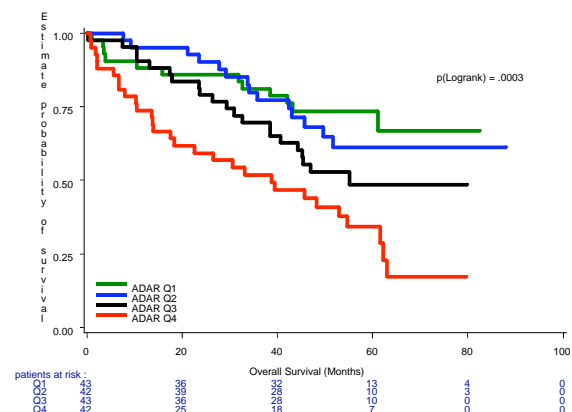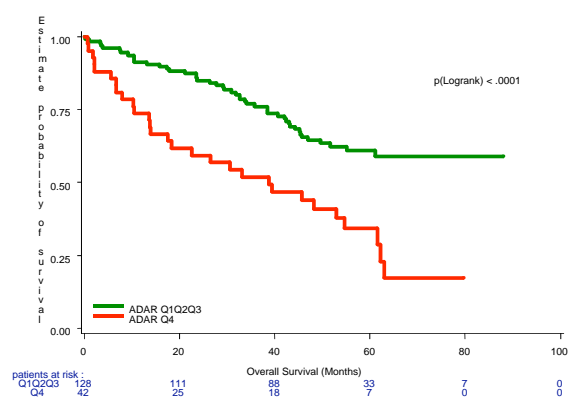

### ALDH9A1 (ALDH4, ALDH7, ALDH9, E3, TMABADH)

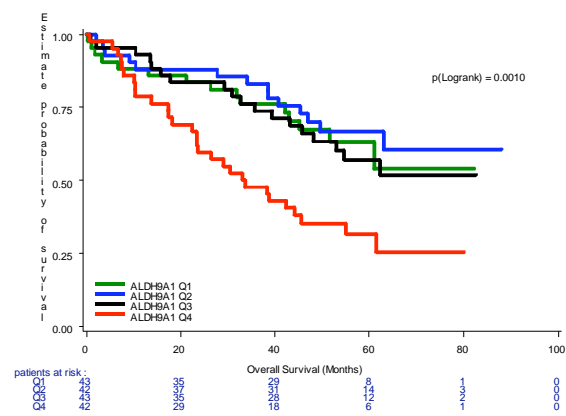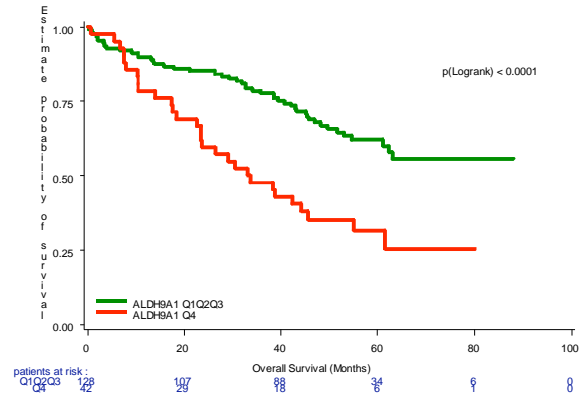

### UBAP2L (NICE-4)

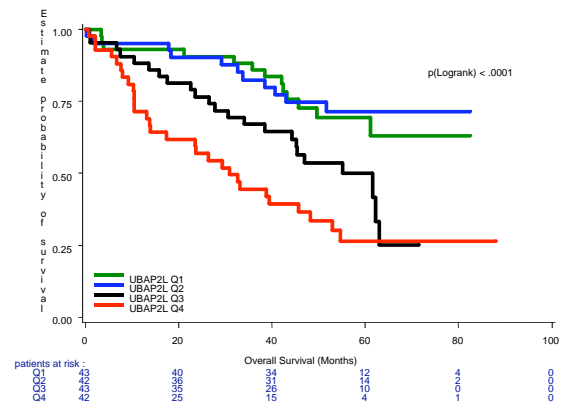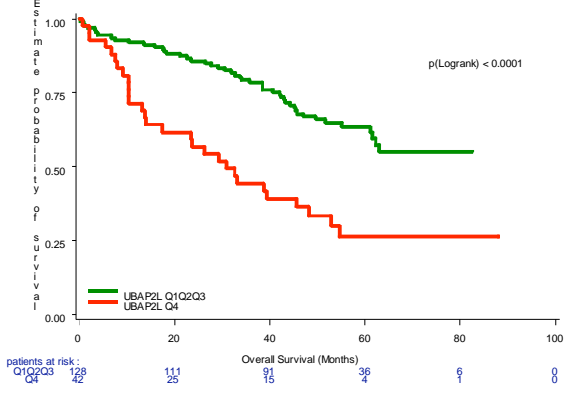

### UBE2Q1 (GTAP, NICE-5, UBE2Q)

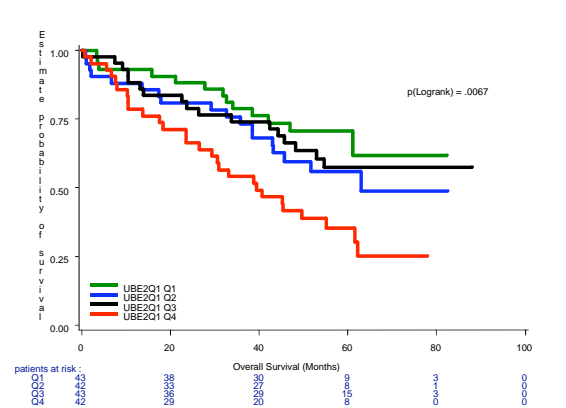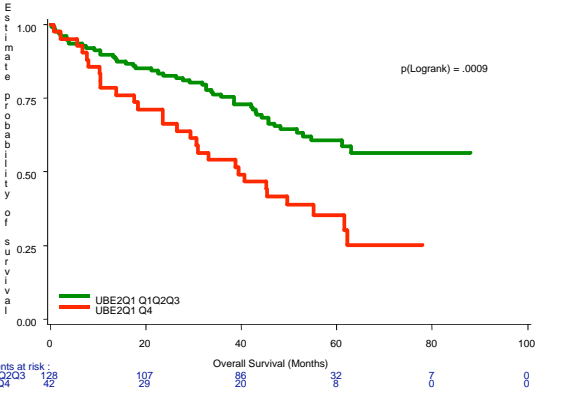



### SHC1 (SHC, SHCA)

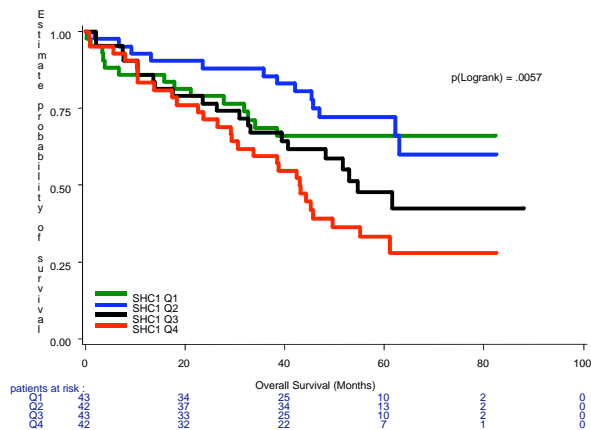

### CKS1B (CKS1)

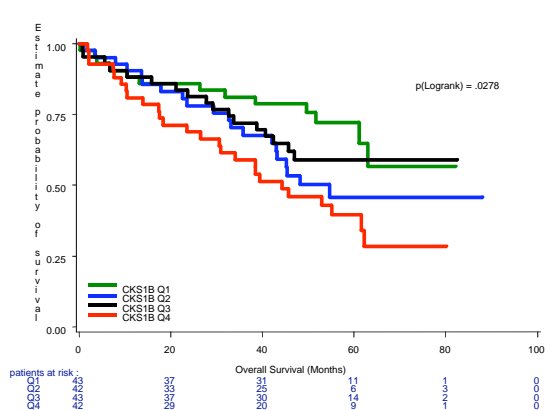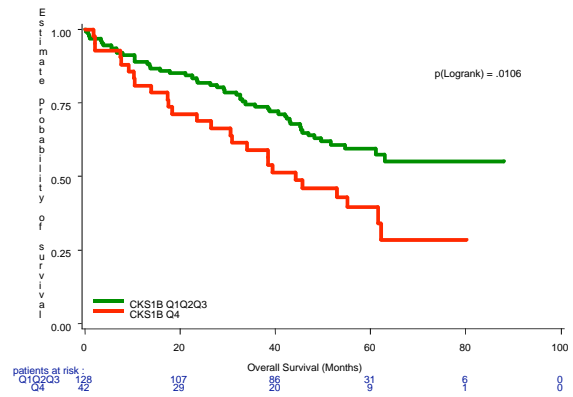

### TMCO1 (PCIA3, TMCC4)

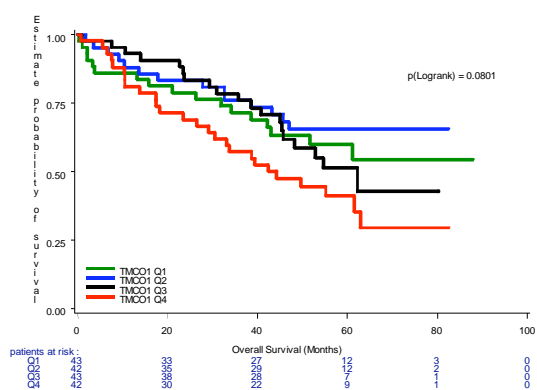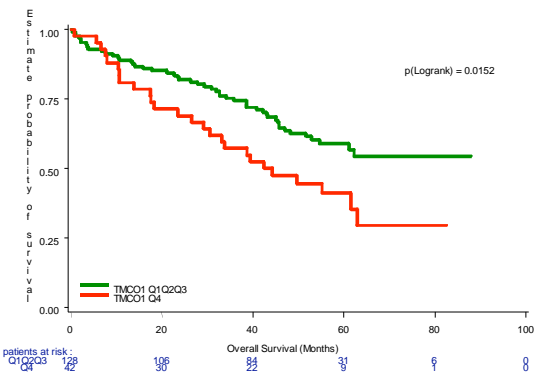

# CREB3L4 (AIBZIP, ATCE1, CREB3, CREB4, JAL)

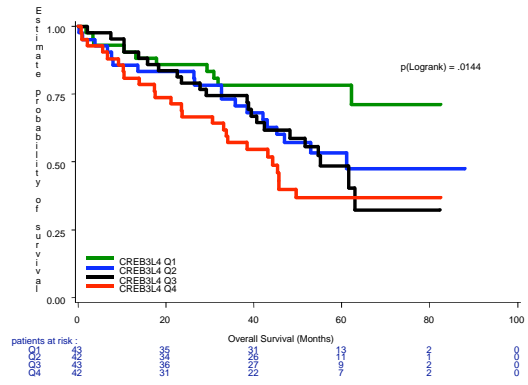

**Article title: Prognostic significance of copy-number alterations in multiple myeloma**

**Appendix Fig A8.**

Kaplan-Meier plot of overall survival considering the expression of the gene of interest residing in 5q31:

NRG2 (DON1, HRG2, NTAK)

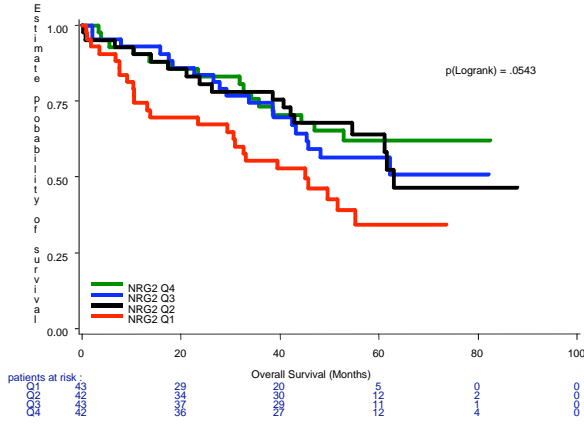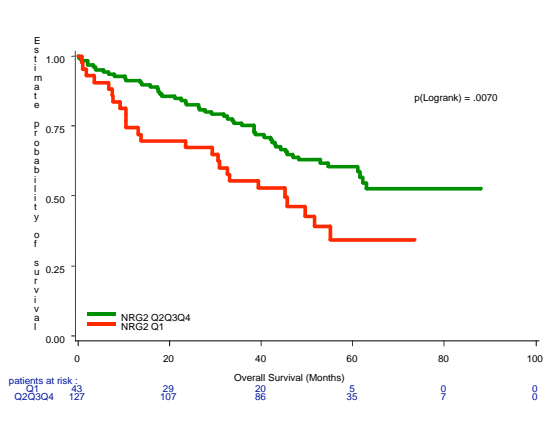

Article title: Prognostic significance of copy-number alterations in multiple myeloma

Appendix Fig A9.

Kaplan-Meier plot of overall survival considering the expression of the genes of interest residing in 12p31. Genes are ordered by increasing P-value (log-rank).

CD27 (TNFRSF7)

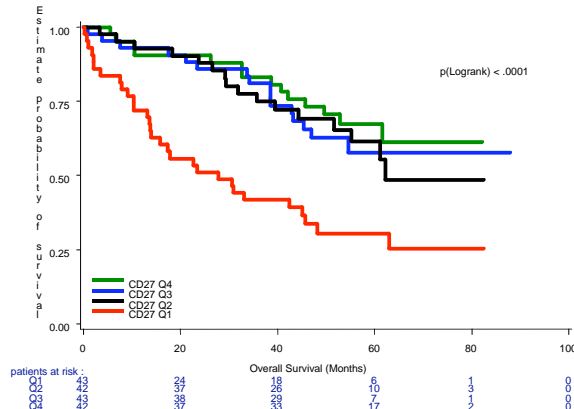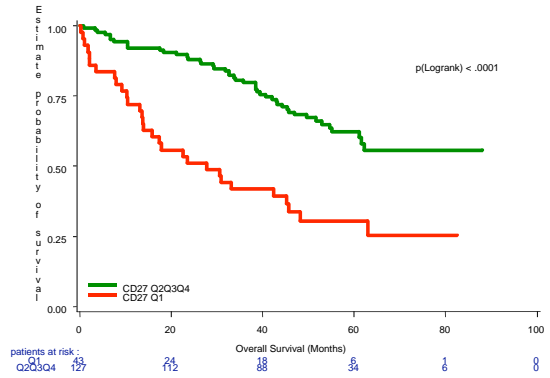

LAG3 (CD223)

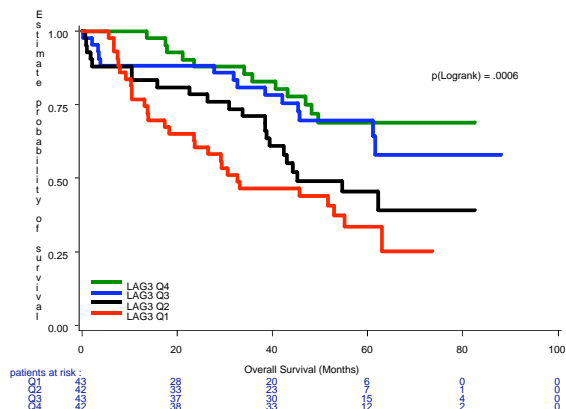

TAPBPL

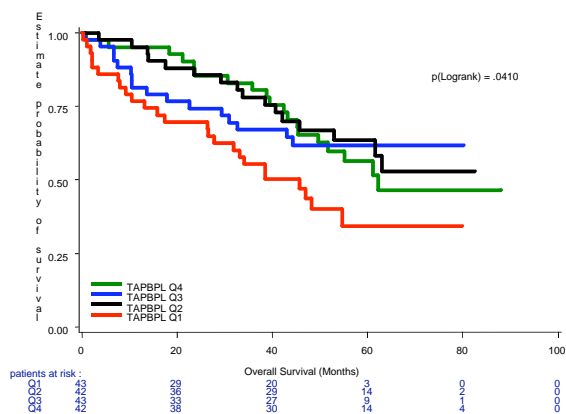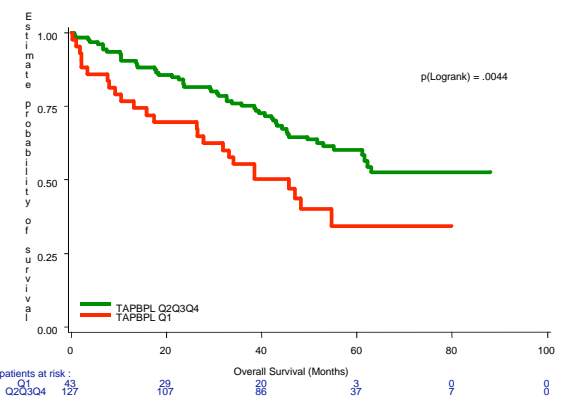

Article title: Prognostic significance of copy-number alterations in multiple myeloma

Appendix Fig A10.

Impact of del(16q12.1) (A) and del(16q23.2) (B) on OS

A

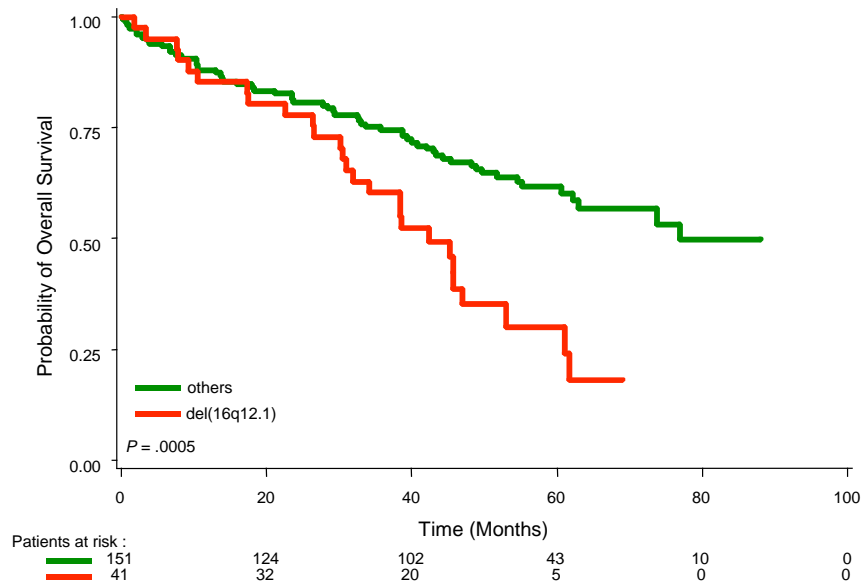

B

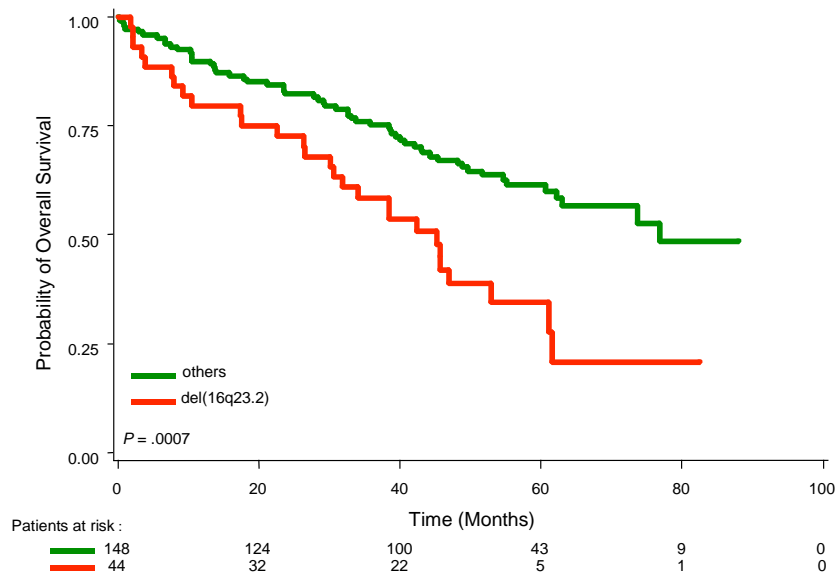

Article title: Prognostic significance of copy-number alterations in multiple myeloma

Appendix Fig A11.

Kaplan-Meier analysis of overall survival in patients of initial and validation cohorts

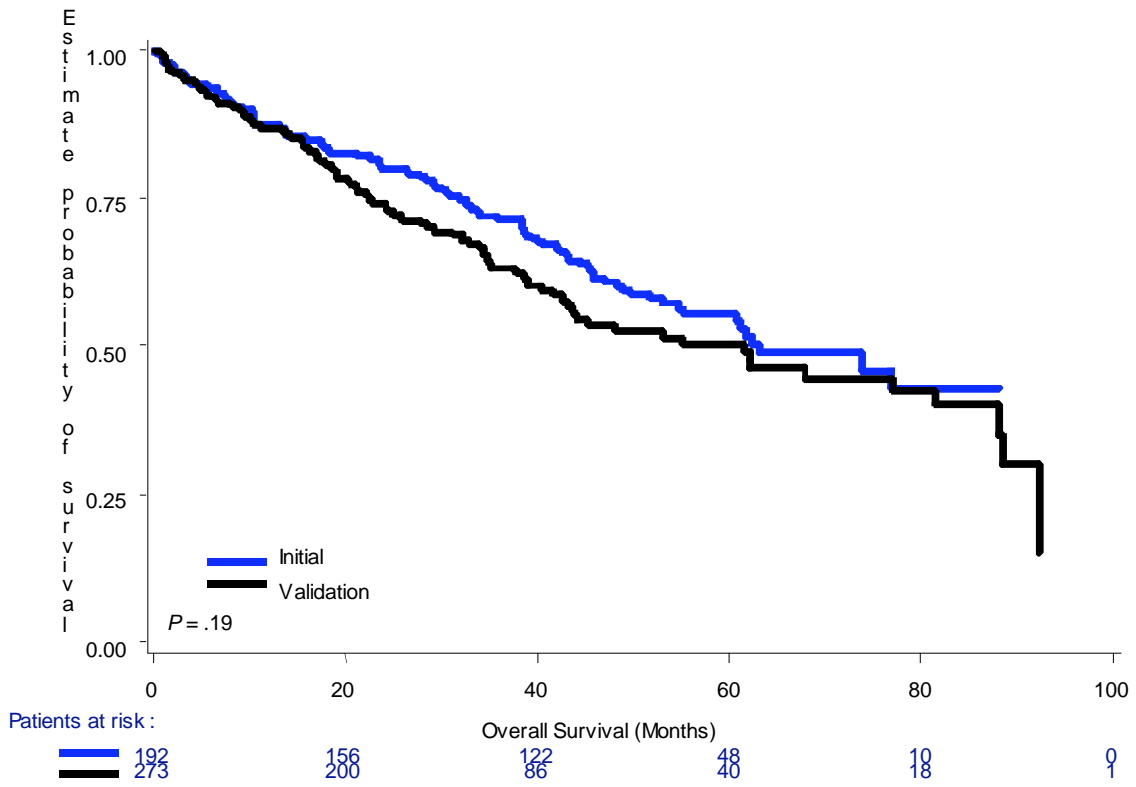

Supplement: JCO.2008.20.6136_2.pdf [file JCO.2008.20.6136_2.pdf]
